# Supplementary material for: Prevalence and risk factors for falls among community-dwelling adults in Riyadh area
Source: PeerJ. 2023 Dec 6;11:e16478. doi: 10.7717/peerj.16478 (PMC10710170; doi:10.7717/peerj.16478)
Supplement: Supplemental Information 2 — Dataset ID doesn’t contain any identifiable initials for the participants. [file peerj-11-16478-s002.xlsx]

## Sheet: Saudi Falls dataset for submiss
ID	Age_Categories	Age_numbers	height	Height_m	weight	BMI_new	matialstatus	sex	education	occupation	Num_Comorb	smoking	arthritis	diabetes	Hypertension	CVD	backpain	backpainseverity	dyslipidemia	anemia	osteoporosis	historyoffracture	neurologicaldisease	typeofneuro	otherdiseases	fallhistory	numberoffall	BDItotal	BDI_Categories	Recurrent_fallers
AH2020	4	58	173	1.73	74	24.7252	2	1	4	2	3	1	0	1	0	0	0	0	1	0	0	0	1		0	0	0	12	1	0
AMC003	5	70	173	1.73	71	23.7228	2	1	4	2	4	0	0	0	1	1	0	0	0	0	0	1	1		#NULL!	1	1	4	0	1
GR29	3	50	170	1.7	72	24.9135	2	1	4	1	1	0	0	0	0	0	0	0	0	0	0	0	1	0	0	0	1	1	0	1
GR37	4	57	174	1.74	79	26.0933	2	1	1	2	3	1	0	1	0	0	0	0	1	0	0	0	1	stroke	0	0	0	0	0	0
AA020	4	56	166	1.66	74	26.8544	2	1	4	2	3	0	1	0	1	0	1	4	0	0	0	1	0	0	0	1	2	12	1	2
MZB007	2	42	172	1.72	77	26.0276	2	1	3	1	1	1	1	0	0	0	1	3	0	0	0	0	0	0	0	1	1	21	2	1
GR42	2	44	172	1.72	117	39.5484	2	1	2	1	2	0	1	0	0	0	1	6	1	0	0	0	0	0	0	1	4	22	2	2
GR09	2	40	181	1.81	120	36.6289	1	1	1	1	3	1	#NULL!	1	1	0	1	8	0	0	0	1	0	0	0	1	9	25	2	2
AMC006	2	40	192	1.92	135	36.6211	2	1	3	1	1	0	0	0	0	0	1	9	0	0	0	1	0	0	0	1	1	12	1	1
AA001	2	42	159	1.59	93.9	37.1425	2	1	4	1	3	0	0	0	1	0	1	2	0	0	0	1	0	0	0	1	1	13	1	1
AD005	3	45	168	1.68	98	34.7222	2	1	3	1	2	1	0	0	0	0	1	3	1	0	0	1	0	0	0	1	1	16	1	1
GR26	3	48	161	1.61	72	27.7767	2	1	3	2	1	0	0	0	0	0	1	5	0	0	0	1	0	0	0	1	1	22	2	1
AD008	3	48	176	1.76	102	32.9287	2	1	4	1	1	1	0	0	0	0	1	3	0	0	0	1	0	0	0	1	4	23	2	2
AA018	3	49	166	1.66	60	21.7738	2	1	4	1	2	0	0	1	0	0	1	3	0	0	0	1	0	0	0	0	0	12	1	0
AMC001	4	56	176	1.76	75	24.2123	2	1	3	1	2	0	0	1	0	0	1	5	0	0	0	1	0	0	0	0	0	17	2	0
AH16	5	67	170	1.7	84	29.0657	2	1	3	2	2	0	0	0	0	0	1	6	0	0	1	1	0	0	0	0	0	16	1	0
AMC005	2	43	174	1.74	120	39.6354	2	1	3	1	4	0	1	0	1	0	1	8	1	0	0	1	0	0	0	0	0	6	0	0
Ah2041	3	50	173	1.73	95	31.7418	2	1	4	1	4	0	1	1	1	0	0	0	0	0	0	1	0	0	0	0	0	16	1	0
AA005	2	42	168	1.68	88	31.1791	2	1	4	1	0	0	0	0	0	0	1	4	0	0	0	0	0	0	0	0	0	12	1	0
MZB005	3	45	168	1.68	80	28.3447	2	1	4	1	2	0	0	1	0	0	1	3	1	0	0	0	0	0	0	0	0	18	2	0
GR02	3	54	182	1.82	110	33.2085	2	1	4	1	4	0	0	1	1	1	1	3	1	0	0	0	0	0	0	0	0	13	1	0
GR06	4	60	167	1.67	73	26.1752	2	1	3	1	0	0	0	0	0	0	1	6	0	0	0	0	0	0	0	0	0	13	1	0
Ah2037	5	66	170	1.7	89	30.7958	2	1	4	2	1	0	0	0	1	0	1	7	0	0	0	0	0	0	0	0	0	12	1	0
Ah2034	6	79	165	1.65	60	22.0386	2	1	2	2	7	0	0	1	1	1	1	6	0	1	1	0	0	0	0	1	1	23	2	1
AB006	2	41	181	1.81	78	23.8088	2	1	2	1	1	0	1	0	0	0	0	0	0	0	0	0	0	0	0	0	0	24	2	0
Ah2045	2	44	174	1.74	74	24.4418	2	1	4	1	2	1	1	0	1	0	1	2	0	0	0	0	0	0	0	0	0	7	0	0
AA019	3	45	172	1.72	93	31.4359	2	1	4	1	1	0	1	0	0	0	0	0	0	0	0	0	0	0	0	1	2	13	1	2
GR12	3	48	161	1.61	56	21.6041	2	1	2	1	3	0	1	1	0	0	1	7	0	0	1	0	0	0	0	0	0	5	0	0
AH29	3	51	181	1.81	91	27.7769	2	1	3	2	1	0	1	0	0	0	1	6	0	0	0	0	0	0	0	0	#NULL!	4	0	#NULL!
AA015	3	51	175	1.75	93	30.3673	2	1	4	1	1	0	1	0	0	0	0	0	0	0	0	0	0	0	0	0	0	15	1	0
AA001	4	58	169	1.69	92.8	32.4919	2	1	2	1	2	1	1	0	1	0	1	7	0	0	0	0	0	0	0	0	0	11	1	0
AMA003	4	59	175	1.75	88	28.7347	2	1	2	2	1	0	1	0	0	0	1	6	0	0	0	0	0	0	0	1	1	7	0	1
MZA003	4	59	175	1.75	88	28.7347	2	1	2	2	1	0	1	0	0	0	1	6	0	0	0	0	0	0	0	1	1	7	0	1
AH43	2	44	169	1.69	65	22.7583	1	1	4	1	1	1	0	0	0	0	1	6	0	0	0	1	0	0	0	0	0	8	0	0
MZA001	3	45	156	1.56	77.5	31.8458	2	1	4	1	3	1	0	0	1	0	0	0	0	1	0	1	0	0	0	0	0	22	2	0
AA016	3	48	176	1.76	89	28.7319	2	1	4	1	1	0	0	0	0	0	1	6	0	0	0	1	0	0	0	1	1	3	0	1
GR44	3	48	168	1.68	73	25.8645	2	1	3	1	1	0	0	0	0	0	1	4	0	0	0	1	0	0	0	0	0	2	0	0
GR21	3	50	167	1.67	80	28.6851	2	1	4	1	1	0	0	0	0	0	1	3	0	0	0	1	0	0	0	0	0	2	0	0
AH13	4	55	172	1.72	114	38.5343	2	1	3	2	2	0	0	0	0	0	1	4	0	0	1	1	0	0	0	0	0	5	0	0
AA003	2	42	162	1.62	130	49.5351	2	1	4	1	2	0	1	0	0	0	0	0	0	0	0	1	0	0	0	0	0	9	0	0
AA006	3	45	177	1.77	84.7	27.0357	2	1	4	1	3	0	1	0	1	0	0	0	0	0	0	1	0	0	0	0	0	11	1	0
AA012	3	48	166	1.66	91	33.0237	2	1	4	1	2	0	1	0	0	0	0	0	0	0	0	1	0	0	0	0	0	5	0	0
AMA008	2	40	180	1.8	95	29.321	2	1	4	1	0	1	0	0	0	0	1	3	0	0	0	0	0	0	0	1	1	7	0	1
MZA008	2	40	180	1.8	95	29.321	2	1	4	1	0	1	0	0	0	0	1	3	0	0	0	0	0	0	0	1	1	7	0	1
GR22	2	40	168	1.68	69	24.4473	1	1	4	1	0	0	0	0	0	0	0	0	0	0	0	0	0	0	0	0	0	15	1	0
AD007	2	40	170	1.7	70	24.2215	1	1	4	1	0	0	0	0	0	0	0	0	0	0	0	0	0	0	0	0	0	21	2	0
AH21	2	40	183	1.83	72	21.4996	2	1	4	1	0	0	0	0	0	0	0	0	0	0	0	0	0	0	0	0	0	22	2	0
AD010	2	41	179	1.79	78	24.3438	2	1	4	1	0	1	0	0	0	0	1	5	0	0	0	0	0	0	0	0	0	0	0	0
AH8	2	41	162	1.62	60	22.8624	2	1	4	1	0	0	0	0	0	0	0	0	0	0	0	0	0	0	0	0	0	14	1	0
AH41	2	41	181	1.81	78	23.8088	2	1	4	1	1	1	0	0	1	0	0	0	0	0	0	0	0	0	0	0	0	12	1	0
AD015	2	42	177	1.77	114	36.388	2	1	3	1	0	1	0	0	0	0	0	0	0	0	0	0	0	0	0	0	0	13	1	0
AH53	2	42	168	1.68	137	48.5402	2	1	3	1	0	1	0	0	0	0	0	0	0	0	0	0	0	0	0	0	0	26	2	0
GR04	3	45	160	1.6	61	23.8281	2	1	3	1	0	0	0	0	0	0	1	1	0	0	0	0	0	0	0	0	0	13	1	0
AA013	3	45	179	1.79	84	26.2164	1	1	4	1	0	0	0	0	0	0	0	0	0	0	0	0	0	0	0	1	1	12	1	1
AH7	3	46	165	1.65	75	27.5482	2	1	4	1	0	0	0	0	0	0	1	5	0	0	0	0	0	0	0	0	0	9	0	0
AA010	3	46	166	1.66	121	43.9106	2	1	4	1	0	0	0	0	0	0	1	2	0	0	0	0	0	0	0	0	0	11	1	0
A002	3	46	168	1.68	84	29.7619	2	1	4	1	0	0	0	0	0	0	0	0	0	0	0	0	0	0	0	0	0	12	1	0
AH47	3	47	173	1.73	73	24.3911	2	1	3	1	1	1	0	1	0	0	1	5	0	0	0	0	0	0	0	0	0	0	0	0
GR01	3	47	156	1.56	60	24.6548	2	1	2	1	2	0	0	1	0	0	1	5	1	0	0	0	0	0	0	0	0	4	0	0
AA017	3	47	179	1.79	89	27.7769	2	1	4	1	0	1	0	0	0	0	1	8	0	0	0	0	0	0	0	0	0	8	0	0
AH36	3	47	177	1.77	70	22.3435	2	1	4	1	1	1	0	0	0	0	1	5	0	0	0	0	0	0	0	0	0	4	0	0
AMA007	3	48	163	1.63	83	31.2394	2	1	3	1	0	0	0	0	0	0	1	8	0	0	0	0	0	0	0	0	0	1	0	0
MZA007	3	48	163	1.63	83	31.2394	2	1	3	1	0	0	0	0	0	0	1	8	0	0	0	0	0	0	0	0	0	1	0	0
AMA009	3	48	175	1.75	67	21.8776	2	1	4	1	0	0	0	0	0	0	1	2	0	0	0	0	0	0	0	0	0	1	0	0
MZA009	3	48	175	1.75	67	21.8776	2	1	4	1	0	0	0	0	0	0	1	2	0	0	0	0	0	0	0	0	0	1	0	0
AMA001	3	48	174	1.74	106	35.0112	2	1	4	1	0	0	0	0	0	0	1	2	0	0	0	0	0	0	0	0	0	0	0	0
AH30	3	49	179	1.79	79	24.6559	2	1	4	1	0	0	0	0	0	0	1	5	0	0	0	0	0	0	0	0	0	8	0	0
GR58	3	50	166	1.66	80	29.0318	2	1	3	2	0	0	0	0	0	0	0	0	0	0	0	0	0	0	0	0	0	15	1	0
GR25	3	50	177	1.77	91	29.0466	2	1	4	1	0	0	0	0	0	0	0	0	0	0	0	0	0	0	0	0	0	31	3	0
Ah2048	3	50	165	1.65	82	30.1194	2	1	4	1	1	0	0	0	1	0	0	0	0	0	0	0	0	0	0	0	0	18	2	0
GR18	3	51	178	1.78	68	21.4619	2	1	3	2	0	1	0	0	0	0	0	0	0	0	0	0	0	0	0	0	0	22	2	0
A008	3	52	167	1.67	65	23.3067	2	1	4	1	0	0	0	0	0	0	0	0	0	0	0	0	0	0	#NULL!	0	0	19	2	0
GR49	3	52	178	1.78	79	24.9337	2	1	1	1	0	0	0	0	0	0	1	0	0	0	0	0	0	0	0	0	0	24	2	0
GR15	3	53	182	1.82	100	30.1896	2	1	4	1	0	0	0	0	0	0	1	5	0	0	0	0	0	0	0	0	0	5	0	0
AMC008	3	53	165	1.65	80	29.3848	2	1	2	2	1	1	0	0	0	0	1	4	0	0	0	0	0	0	0	0	0	9	0	0
AH9	4	57	160	1.6	70	27.3437	2	1	4	2	1	0	0	0	0	0	1	6	0	0	1	0	0	0	0	0	0	11	1	0
MZB008	4	58	163	1.63	85	31.9922	3	1	3	1	1	0	0	0	0	0	0	0	0	0	0	0	0	0	0	1	2	21	2	2
GR08	5	65	175	1.75	89	29.0612	2	1	3	2	1	0	#NULL!	0	0	0	1	3	0	1	0	0	0	0	0	0	0	6	0	0
GR48	5	65	170	1.7	66	22.8374	2	1	1	2	0	0	0	0	0	0	1	0	0	0	0	0	0	0	0	0	0	15	1	0
A012	3	54	168	1.68	106	37.5567	2	1	2	1	1	0	1	0	0	0	0	0	0	0	0	0	0	0	0	0	0	2	0	0
AH27	4	57	180	1.8	91	28.0864	2	1	4	2	1	0	1	0	0	0	0	0	0	0	0	0	0	0	0	0	0	6	0	0
AB004	5	65	167	1.67	85	30.478	2	1	3	2	2	0	1	1	0	0	0	0	0	0	0	0	0	0	0	0	0	8	0	0
AMB001	5	72	167	1.67	86	30.8365	2	1	3	2	3	0	1	1	0	0	0	0	1	0	0	0	0	0	0	0	0	4	0	0
MZC001	5	72	167	1.67	86	30.8365	2	1	3	2	3	0	1	1	0	0	0	0	1	0	0	0	0	0	0	0	0	4	0	0
GR03	2	40	173	1.73	71	23.7228	2	1	3	1	1	1	0	0	0	0	0	0	0	0	0	1	0	0	0	0	0	4	0	0
AD001	2	41	168	1.68	82	29.0533	2	1	4	1	1	0	0	0	0	0	0	0	0	0	0	1	0	0	0	0	0	0	0	0
AD009	2	42	170	1.7	70	24.2215	2	1	2	2	1	1	0	0	0	0	0	0	0	0	0	1	0	0	0	0	0	1	0	0
AMA005	3	46	183	1.83	91	27.1731	2	1	4	1	1	0	0	0	0	0	0	0	0	0	0	1	0	0	0	0	0	5	0	0
MZA005	3	46	183	1.83	91	27.1731	2	1	4	1	1	0	0	0	0	0	0	0	0	0	0	1	0	0	0	0	0	5	0	0
GR010	3	48	156	1.56	75	30.8185	2	1	3	1	1	0	0	0	0	0	0	0	0	0	0	1	0	0	0	0	0	6	0	0
AA014	3	49	171	1.71	82.7	28.2822	2	1	4	1	1	0	0	0	0	0	0	0	0	0	0	1	0	0	0	0	0	5	0	0
AMB005	2	40	169	1.69	102	35.713	2	1	3	1	0	0	0	0	0	0	0	0	0	0	0	0	0	0	0	1	1	1	0	1
MZC005	2	40	169	1.69	102	35.713	2	1	3	1	0	0	0	0	0	0	0	0	0	0	0	0	0	0	0	1	1	1	0	1
AC003	2	40	170	1.7	67	23.1834	2	1	4	1	0	1	0	0	0	0	0	0	0	0	0	0	0	0	0	0	0	4	0	0
GR33	2	40	175	1.75	70	22.8571	2	1	4	1	0	1	0	0	0	0	0	0	0	0	0	0	0	0	0	0	0	0	0	0
AH5	2	40	167	1.67	73	26.1752	2	1	4	1	0	0	0	0	0	0	0	0	0	0	0	0	0	0	0	0	0	2	0	0
AH12	2	40	174	1.74	78	25.763	2	1	4	1	0	0	0	0	0	0	0	0	0	0	0	0	0	0	0	0	0	9	0	0
GR23	2	40	167	1.67	79	28.3266	2	1	4	1	0	1	0	0	0	0	0	0	0	0	0	0	0	0	0	0	0	3	0	0
GR51	2	40	174	1.74	80	26.4236	2	1	3	1	0	0	0	0	0	0	0	0	0	0	0	0	0	0	0	0	0	0	0	0
AH39	2	40	175	1.75	81	26.449	2	1	4	1	0	1	0	0	0	0	0	0	0	0	0	0	0	0	0	0	0	10	1	0
AH14	2	40	173	1.73	73	24.3911	2	1	4	1	1	0	0	0	0	0	0	0	0	0	1	0	0	0	0	0	0	4	0	0
AH25	2	41	169	1.69	60	21.0077	2	1	4	1	0	0	0	0	0	0	0	0	0	0	0	0	0	0	0	0	0	11	1	0
Ah2026	2	41	157	1.57	66	26.7759	2	1	4	1	0	0	0	0	0	0	0	0	0	0	0	0	0	0	0	0	0	0	0	0
AH10	2	41	164	1.64	76	28.257	2	1	4	1	0	0	0	0	0	0	0	0	0	0	0	0	0	0	0	0	0	4	0	0
AMA004	2	41	168	1.68	79	27.9904	2	1	4	1	0	1	0	0	0	0	0	0	0	0	0	0	0	0	0	0	0	1	0	0
MZA004	2	41	168	1.68	79	27.9904	2	1	4	1	0	1	0	0	0	0	0	0	0	0	0	0	0	0	0	0	0	1	0	0
GR27	2	41	169	1.69	79	27.6601	2	1	3	1	0	1	0	0	0	0	0	0	0	0	0	0	0	0	0	0	0	4	0	0
AC001	2	41	171	1.71	79	27.0169	2	1	3	1	0	0	0	0	0	0	0	0	0	0	0	0	0	0	0	0	0	3	0	0
AH51	2	41	182	1.82	88	26.5668	2	1	2	1	0	1	0	0	0	0	0	0	0	0	0	0	0	0	0	0	0	0	0	0
AH3	2	41	160	1.6	130	50.7812	2	1	4	1	1	0	0	0	1	0	0	0	0	0	0	0	0	0	0	0	0	6	0	0
AD003	2	42	180	1.8	85	26.2346	2	1	2	1	2	0	0	1	0	0	0	0	1	0	0	0	0	0	0	0	0	9	0	0
GR53	2	42	167	1.67	68	24.3824	2	1	4	1	0	0	0	0	0	0	0	0	0	0	0	0	0	0	0	0	0	1	0	0
AMA002	2	42	170	1.7	73	25.2595	2	1	4	1	0	0	0	0	0	0	0	0	0	0	0	0	0	0	0	0	0	1	0	0
MZA002	2	42	170	1.7	73	25.2595	2	1	4	1	0	0	0	0	0	0	0	0	0	0	0	0	0	0	0	0	0	1	0	0
GR28	2	42	174	1.74	77	25.4327	1	1	4	1	0	0	0	0	0	0	0	0	0	0	0	0	0	0	0	0	0	9	0	0
GR32	2	42	172	1.72	78	26.3656	1	1	4	1	0	1	0	0	0	0	0	0	0	0	0	0	0	0	0	0	0	1	0	0
GR24	2	43	171	1.71	79	27.0169	2	1	4	1	0	0	0	0	0	0	0	0	0	0	0	0	0	0	0	0	0	3	0	0
AC008	2	43	175	1.75	88	28.7347	2	1	4	1	0	0	0	0	0	0	0	0	0	0	0	0	0	0	0	0	0	5	0	0
AH11	2	43	173	1.73	100	33.4124	2	1	3	1	0	0	0	0	0	0	0	0	0	0	0	0	0	0	0	0	0	11	1	0
AH4	2	43	169	1.69	95	33.2621	2	1	4	1	1	0	0	0	0	1	0	0	0	0	0	0	0	0	0	0	0	3	0	0
GR52	3	45	175	1.75	54	17.6327	2	1	4	1	0	0	0	0	0	0	0	0	0	0	0	0	0	0	0	0	0	9	0	0
AH32	3	45	179	1.79	77	24.0317	1	1	3	1	0	0	0	0	0	0	0	0	0	0	0	0	0	0	0	0	0	4	0	0
AH28	3	45	180	1.8	88	27.1605	2	1	4	1	0	0	0	0	0	0	0	0	0	0	0	0	0	0	0	0	0	2	0	0
Ah2044	3	45	180	1.8	90	27.7778	2	1	2	1	0	1	0	0	0	0	0	0	0	0	0	0	0	0	0	0	0	0	0	0
AH56	3	45	170	1.7	67	23.1834	2	1	3	0	0	0	0	0	0	0	0	0	0	0	0	0	0	0	0	0	0	5.1	0	0
GR46	3	46	171	1.71	73	24.9649	2	1	3	2	0	1	0	0	0	0	0	0	0	0	0	0	0	0	0	0	0	1	0	0
AD012	3	46	174	1.74	74	24.4418	2	1	4	1	0	1	0	0	0	0	0	0	0	0	0	0	0	0	0	0	0	0	0	0
AD011	3	46	178	1.78	84	26.5118	2	1	4	1	0	0	0	0	0	0	0	0	0	0	0	0	0	0	0	0	0	1	0	0
AH15	3	46	175	1.75	92	30.0408	2	1	4	1	0	0	0	0	0	0	0	0	0	0	0	0	0	0	0	0	0	8	0	0
AMB004	3	46	175	1.75	95	31.0204	2	1	4	1	0	0	0	0	0	0	0	0	0	0	0	0	0	0	0	0	0	6	0	0
MZC004	3	46	175	1.75	95	31.0204	2	1	4	1	0	0	0	0	0	0	0	0	0	0	0	0	0	0	0	0	0	6	0	0
A003	3	47	168	1.68	75	26.5731	2	1	4	1	1	0	0	1	0	0	0	0	0	0	0	0	0	0	0	0	0	0	0	0
Ah2047	3	48	161	1.61	65	25.0762	2	1	4	1	0	1	0	0	0	0	0	0	0	0	0	0	0	0	0	0	0	0	0	0
AH35	3	48	175	1.75	80	26.1224	2	1	3	1	0	0	0	0	0	0	0	0	0	0	0	0	0	0	0	0	0	1	0	0
GR41	3	48	179	1.79	81	25.2801	2	1	3	1	0	1	0	0	0	0	1	0	0	0	0	0	0	0	0	0	0	4	0	0
GR50	3	48	182	1.82	86	25.963	2	1	1	1	0	1	0	0	0	0	0	0	0	0	0	0	0	0	0	0	0	8	0	0
A006	3	49	168	1.68	73	25.8645	2	1	4	1	1	0	0	1	0	0	0	0	0	0	0	0	0	0	0	0	0	1	0	0
A009	3	49	168	1.68	80	28.3447	2	1	3	2	0	0	0	0	0	0	0	0	0	0	0	0	0	0	0	0	0	0	0	0
AC0013	3	49	169	1.69	80	28.0102	2	1	3	2	0	1	0	0	0	0	0	0	0	0	0	0	0	0	0	0	0	8	0	0
AH55	3	49	171	1.71	65	22.2291	2	1	3	1	0	0	0	0	0	0	0	0	0	0	0	0	0	0	0	0	0	0	0	0
AH54	3	49	180	1.8	75	23.1481	2	1	3	1	0	1	0	0	0	0	0	0	0	0	0	0	0	0	0	0	0	0	0	0
MZB003	3	50	#NULL!	#NULL!	#NULL!	#NULL!	2	1	4	1	1	0	0	1	0	0	0	0	0	0	0	0	0	0	0	0	0	6	0	0
AB007	3	50	175	1.75	86	28.0816	2	1	3	1	1	0	0	1	0	0	0	0	0	0	0	0	0	0	0	0	0	2	0	0
AH34	3	50	177	1.77	85	27.1314	2	1	3	2	0	0	0	0	0	0	0	0	0	0	0	0	0	0	0	0	0	4	0	0
AC006	3	50	168	1.68	89	31.5334	2	1	3	2	0	1	0	0	0	0	0	0	0	0	0	0	0	0	0	0	0	5	0	0
GR60	3	50	155	1.55	60	24.974	2	1	2	2	1	0	0	0	0	0	0	0	1	0	0	0	0	0	0	0	0	9	0	0
AB008	3	51	167	1.67	104	37.2907	2	1	2	1	2	0	0	1	1	0	0	0	0	0	0	0	0	0	0	0	0	0	0	0
Ah2039	3	51	170	1.7	70	24.2215	2	1	2	2	0	1	0	0	0	0	0	0	0	0	0	0	0	0	0	0	0	3	0	0
Ah2046	3	51	156	1.56	88	36.1604	2	1	3	2	0	1	0	0	0	0	0	0	0	0	0	0	0	0	0	0	0	0	0	0
AH52	3	51	172	1.72	76	25.6896	2	1	3	1	0	0	0	0	0	0	0	0	0	0	0	0	0	0	0	0	0	2	0	0
A001	3	51	173	1.73	86	28.7347	2	1	3	1	0	0	0	0	0	0	0	0	0	0	0	0	0	0	0	0	0	10	1	0
AB001	3	51	176	1.76	91	29.3776	2	1	3	1	0	0	0	0	0	0	0	0	0	0	0	0	0	0	0	0	0	0	0	0
GR07	3	52	166	1.66	98	35.5639	2	1	3	1	1	0	#NULL!	1	1	0	0	0	0	0	0	0	0	0	0	0	0	5	0	0
GR14	3	52	168	1.68	82	29.0533	2	1	4	1	1	0	0	1	0	0	0	0	0	0	0	0	0	0	0	0	0	3	0	0
MZB004	3	52	168	1.68	70	24.8016	2	1	4	1	1	0	0	1	0	0	0	0	0	0	0	0	0	0	0	0	0	8	0	0
MZC009	3	52	166	1.66	75	27.2173	2	1	3	1	2	0	0	1	1	0	0	0	0	0	0	0	0	0	0	0	0	1	0	0
GR47	3	52	169	1.69	83	29.0606	2	1	3	2	0	0	0	0	0	0	0	0	0	0	0	0	0	0	0	0	0	6	0	0
GR59	3	52	179	1.79	80	24.968	2	1	4	1	0	0	0	0	0	0	0	0	0	0	0	0	0	0	0	0	0	7	0	0
AMB002	3	52	175	1.75	95	31.0204	2	1	1	1	0	0	0	0	0	0	0	0	0	0	0	0	0	0	0	0	0	4	0	0
MZC002	3	52	175	1.75	95	31.0204	2	1	1	1	0	0	0	0	0	0	0	0	0	0	0	0	0	0	0	0	0	4	0	0
AMA006	3	53	176	1.76	77	24.858	2	1	4	1	0	0	0	0	0	0	1	1	0	0	0	0	0	0	0	0	0	0	0	0
MZA006	3	53	176	1.76	77	24.858	2	1	4	1	0	0	0	0	0	0	1	1	0	0	0	0	0	0	0	0	0	0	0	0
AD006	3	53	170	1.7	72	24.9135	2	1	3	1	1	0	0	0	0	0	0	0	1	0	0	0	0	0	0	0	0	2	0	0
GR56	3	54	153	1.53	64	27.3399	2	1	3	2	1	0	0	1	0	0	0	0	0	0	0	0	0	0	0	0	0	3	0	0
AH40	3	54	165	1.65	86	31.5886	2	1	4	1	0	0	0	0	0	0	0	0	0	0	0	0	0	0	0	0	0	0	0	0
AMA010	3	54	177	1.77	116	37.0264	2	1	4	1	0	0	0	0	0	0	0	0	0	0	0	0	0	0	0	0	0	2	0	0
MZA010	3	54	177	1.77	116	37.0264	2	1	4	1	0	0	0	0	0	0	0	0	0	0	0	0	0	0	0	0	0	2	0	0
Ah2052	4	55	173	1.73	77	25.7276	2	1	4	2	0	0	0	0	0	0	0	0	0	0	0	0	0	0	0	0	0	5	0	0
GR57	4	55	174	1.74	74	24.4418	2	1	2	1	0	0	0	0	0	0	0	0	0	0	0	0	0	0	0	0	0	0	0	0
Ah2027	4	56	169	1.69	87	30.4611	2	1	3	2	1	1	0	1	0	0	0	0	0	0	0	0	0	0	0	0	0	9	0	0
A011	4	56	168	1.68	85	30.1162	2	1	3	2	0	0	0	0	0	0	0	0	0	0	0	0	0	0	0	0	0	4	0	0
GR54	4	57	165	1.65	85	31.2213	2	1	2	2	1	0	0	1	0	0	0	0	0	0	0	0	0	0	0	0	0	11	1	0
GR05	4	58	175	1.75	82	26.7755	2	1	4	1	1	0	0	1	0	0	0	0	0	0	0	0	0	0	0	0	0	0	0	0
AH17	4	58	170	1.7	72	24.9135	2	1	4	2	0	0	0	0	0	0	0	0	0	0	0	0	0	0	0	0	0	5	0	0
A016	4	58	176	1.76	108	34.8657	2	1	2	1	0	0	0	0	0	0	0	0	0	0	0	0	0	0	0	0	0	6	0	0
GR30	4	59	178	1.78	93	29.3524	2	1	4	2	4	0	0	1	1	0	0	0	1	0	0	0	0	0	0	0	0	7	0	0
AH2	4	60	166	1.66	71	25.7657	2	1	4	2	0	0	0	0	0	0	0	0	0	0	0	0	0	0	0	0	0	1	0	0
Ah2036	4	60	174	1.74	75	24.7721	2	1	4	2	0	1	0	0	0	0	0	0	0	0	0	0	0	0	0	0	0	11	1	0
AMB003	4	60	168	1.68	109	38.6196	2	1	3	1	0	0	0	0	0	0	0	0	0	0	0	0	0	0	0	0	0	0	0	0
MZC003	4	60	168	1.68	109	38.6196	2	1	3	1	0	0	0	0	0	0	0	0	0	0	0	0	0	0	0	0	0	0	0	0
A010	4	62	190	1.9	80	22.1607	2	1	1	1	3	0	0	1	1	1	1	0	0	0	0	0	0	0	0	0	0	10	1	0
AMC007	4	63	168	1.68	75	26.5731	2	1	3	2	1	0	0	1	0	0	0	0	0	0	0	0	0	0	0	0	0	3	0	0
AH24	4	64	156	1.56	62	25.4767	2	1	1	1	1	0	0	1	0	0	0	0	0	0	0	0	0	0	0	1	1	0	0	1
GR55	5	65	176	1.76	59	19.047	2	1	4	2	0	0	0	0	0	0	0	0	0	0	0	0	0	0	0	0	0	7	0	0
GR43	5	66	167	1.67	101	36.215	2	1	0	2	4	0	0	1	1	1	0	0	1	0	0	0	0	0	0	0	0	8	0	0
AH22	5	67	168	1.68	63	22.3214	2	1	2	2	2	0	0	0	1	0	0	0	0	0	0	0	0	0	0	0	0	4	0	0
MZC007	5	69	170	1.7	70	24.2215	2	1	4	2	1	0	0	0	0	0	0	0	1	0	0	0	0	0	0	0	0	0	0	0
AH48	6	80	177	1.77	65	20.7476	2	1	3	1	0	0	0	0	0	0	0	0	0	0	0	0	0	0	0	0	0	2	0	0
MZB009	3	52	160	1.6	96	37.5	3	0	3	0	4	0	0	1	1	0	1	3	0	1	0	0	1		0	0	0	16	1	0
AH19	2	40	156	1.56	53	21.7784	2	0	2	1	1	0	0	0	0	0	0	0	0	0	0	0	1	0	0	0	0	14	1	0
AH49	6	75	163	1.63	101	38.0142	4	0	0	0	3	0	0	0	1	0	0	0	0	0	1	0	1	1	0	1	3	39.1	3	2
GR35	2	44	152	1.52	71	30.7306	1	0	4	1	1	1	0	0	0	0	0	0	0	0	0	0	1	0	0	0	0	4	0	0
AA009	2	42	158	1.58	71	28.441	2	0	4	1	2	0	1	0	0	0	1	8	0	1	0	0	0	0	0	1	3	13	1	2
Ah2032	3	52	160	1.6	81	31.6406	2	0	4	1	4	0	1	1	1	0	1	6	1	0	0	0	0	0	0	1	1	21	2	1
AA008	3	52	158	1.58	71.4	28.6012	2	0	4	2	3	0	1	0	1	0	1	5	0	1	0	0	0	0	0	0	0	15	1	0
Ah2038	4	58	165	1.65	110	40.404	2	0	0	0	2	0	1	0	0	0	1	5	1	0	0	0	0	0	0	0	0	13	1	0
GR31	4	56	165	1.65	72	26.4463	2	0	4	1	5	0	0	1	1	0	1	7	1	0	1	1	0	0	0	0	0	23	2	0
AD014	4	60	160	1.6	90	35.1562	4	0	0	2	6	0	0	1	1	0	1	5	1	1	1	1	0	0	0	0	0	20	2	0
MZB006	2	40	165	1.65	70	25.7117	2	0	4	1	2	0	0	1	0	0	1	3	1	0	0	0	0	0	0	0	0	30	3	0
MZB002	3	45	#NULL!	#NULL!	#NULL!	#NULL!	2	0	4	0	1	0	0	0	0	0	1	6	0	1	0	0	0	0	0	0	0	19	2	0
AD013	3	45	155	1.55	45	18.7305	2	0	4	1	1	0	0	0	0	0	1	5	0	1	0	0	0	0	0	0	0	23	2	0
AH6	5	73	163	1.63	106	39.8961	4	0	1	0	4	0	0	1	1	0	1	3	1	0	1	0	0	0	0	0	0	21	2	0
GR16	2	42	165	1.65	93	34.1598	2	0	4	1	2	0	1	0	0	0	1	4	0	1	0	0	0	0	0	0	0	2	0	0
GR45	3	49	162	1.62	82	31.2452	2	0	1	0	3	0	1	0	0	0	1	4	1	1	0	0	0	0	0	0	0	9	0	0
AMB006	3	53	163	1.63	100	37.6378	2	0	0	0	1	0	1	0	0	0	0	0	0	0	0	0	0	0	0	0	0	17	2	0
MZC006	3	53	163	1.63	100	37.6378	2	0	0	0	1	0	1	0	0	0	0	0	0	0	0	0	0	0	0	0	0	17	2	0
Ah2033	4	55	148	1.48	75	34.2403	2	0	3	0	4	0	1	1	0	1	0	0	1	0	0	0	0	0	0	0	0	17	2	0
AH1	3	52	165	1.65	81	29.7521	2	0	2	0	2	0	0	0	0	0	1	3	0	0	1	1	0	0	0	0	0	5	0	0
AA011	2	41	154	1.54	89	37.5274	2	0	4	1	3	0	1	0	0	0	0	0	0	0	0	1	0	0	0	1	2	0	0	2
AH42	3	45	150	1.5	80	35.5556	2	0	4	1	2	0	1	0	0	0	0	0	0	0	0	1	0	0	0	0	0	1	0	0
Ah2035	4	55	144	1.44	95	45.814	2	0	3	2	4	0	1	0	0	0	0	0	1	0	1	1	0	0	0	0	0	11	1	0
AB009	1	40	155	1.55	77	32.0499	2	0	3	0	1	0	0	1	0	0	0	0	0	0	0	0	0	0	0	0	0	16	1	0
A004	2	40	158	1.58	60	24.0346	2	0	4	1	0	0	0	0	0	0	0	0	0	0	0	0	0	0	0	0	0	13	1	0
Ah2050	2	40	170	1.7	75	25.9516	2	0	4	1	0	1	0	0	0	0	0	0	0	0	0	0	0	0	0	0	0	14	1	0
GR13	2	41	161	1.61	49	18.9036	1	0	4	1	0	0	0	0	0	0	0	0	0	0	0	0	0	0	0	0	0	20	2	0
Ah2049	2	41	153	1.53	69	29.4758	2	0	2	0	0	0	0	0	0	0	0	0	0	0	0	0	0	0	0	0	0	12	1	0
GR11	2	41	150	1.5	75	33.3333	2	0	2	0	0	0	0	0	0	0	0	0	0	0	0	0	0	0	0	0	0	15	1	0
AB010	2	41	157	1.57	81	32.8614	2	0	2	0	0	0	0	0	0	0	0	0	0	0	0	0	0	0	0	0	0	16	1	0
Ah2040	2	41	160	1.6	80	31.25	2	0	4	0	1	0	0	0	0	0	0	0	0	1	0	0	0	0	0	0	0	12	1	0
AC002	2	42	166	1.66	69	25.0399	2	0	4	1	0	0	0	0	0	0	0	0	0	0	0	0	0	0	0	0	0	15	1	0
A014	2	42	166	1.66	80	29.0318	2	0	4	1	0	0	0	0	0	0	0	0	0	0	0	0	0	0	0	0	0	12	1	0
Ah2043	2	43	164	1.64	80	29.7442	2	0	3	0	0	0	0	0	0	0	1	4	0	0	0	0	0	0	0	0	0	10	1	0
AA004	2	43	150	1.5	78	34.6667	2	0	2	1	0	0	0	0	0	0	0	0	0	0	0	0	0	0	0	0	0	23	2	0
MZC010	2	44	167	1.67	72	25.8166	2	0	0	0	0	0	0	0	0	0	0	0	0	0	0	0	0	0	0	0	0	17	2	0
Ah2023	2	44	145	1.45	75	35.6718	1	0	3	1	1	0	0	0	0	1	0	0	0	0	0	0	0	0	0	0	0	19	2	0
AH31	3	47	160	1.6	65	25.3906	2	0	4	1	0	0	0	0	0	0	1	6	0	0	0	0	0	0	0	0	0	5	0	0
AH33	3	47	163	1.63	110	41.4016	2	0	3	2	0	0	0	0	0	0	1	5	0	0	0	0	0	0	0	0	0	4	0	0
A015	3	47	160	1.6	58	22.6562	2	0	2	2	0	0	0	0	0	0	0	0	0	0	0	0	0	0	0	0	0	26	2	0
AB005	3	47	170	1.7	86	29.7578	2	0	2	0	1	0	0	0	0	1	0	0	0	0	0	0	0	0	0	0	0	24	2	0
MZB010	3	49	152	1.52	62	26.8352	2	0	2	0	1	0	0	0	0	0	0	0	1	0	0	0	0	0	0	0	0	15	1	0
Ah2031	3	51	165	1.65	73	26.8136	2	0	2	0	0	0	0	0	0	0	0	0	0	0	0	0	0	0	0	0	0	15	1	0
AH45	3	52	164	1.64	55	20.4491	3	0	4	1	0	0	0	0	0	0	1	3	0	0	0	0	0	0	0	0	0	9	0	0
AB003	4	55	151	1.51	85	37.2791	2	0	0	0	0	0	0	0	0	0	0	0	0	0	0	0	0	0	0	0	0	18	2	0
GR38	4	59	170	1.7	100	34.6021	2	0	4	1	0	0	0	0	0	0	1	2	0	0	0	0	0	0	0	0	0	6	0	0
AH23	5	68	172	1.72	68	22.9854	3	0	1	0	1	0	0	0	1	0	1	7	0	0	0	0	0	0	0	0	0	10	1	0
MZC008	3	48	158	1.58	77	30.8444	2	0	4	1	4	0	1	0	0	0	0	0	1	1	1	0	0	0	0	0	0	7	0	0
AH37	3	53	144	1.44	84	40.5093	2	0	4	1	3	0	1	0	1	0	0	0	0	0	0	0	0	0	0	1	1	4	0	1
AMC002	4	56	165	1.65	92	33.7925	2	0	3	0	2	0	1	1	0	0	0	0	0	0	0	0	0	0	0	1	1	8	0	1
AH26	4	57	168	1.68	97	34.3679	2	0	1	0	2	0	1	1	0	0	0	0	0	0	0	0	0	0	0	0	0	7	0	0
GR36	2	40	153	1.53	74	31.6118	3	0	4	1	0	1	0	0	0	0	0	0	0	0	0	0	0	0	0	0	0	5	0	0
A013	2	41	160	1.6	52	20.3125	2	0	3	2	0	0	0	0	0	0	0	0	0	0	0	0	0	0	0	0	0	0	0	0
Ah2024	2	41	152	1.52	57	24.6711	2	0	4	1	0	0	0	0	0	0	0	0	0	0	0	0	0	0	0	0	0	0	0	0
GR17	2	41	163	1.63	66	24.841	2	0	4	1	0	0	0	0	0	0	0	0	0	0	0	0	0	0	0	0	0	1	0	0
GR40	2	41	162	1.62	80	30.4832	2	0	4	1	0	0	0	0	0	0	0	0	0	0	0	0	0	0	0	0	0	0	0	0
AC007	2	41	169	1.69	72	25.2092	2	0	0	0	0	0	0	0	0	0	0	0	0	0	0	0	0	0	0	0	0	6	0	0
AC004	2	41	166	1.66	80	29.0318	3	0	2	0	0	0	0	0	0	0	0	0	0	0	0	0	0	0	0	0	0	10	1	0
A005	2	42	160	1.6	72	28.125	2	0	1	2	0	0	0	0	0	0	0	0	0	0	0	0	0	0	0	0	0	5	0	0
MZB001	2	42	166	1.66	64	23.2254	2	0	3	1	0	0	0	0	0	0	0	0	0	0	0	0	0	0	0	0	0	9	0	0
AC005	2	42	170	1.7	69	23.8754	2	0	2	0	0	0	0	0	0	0	0	0	0	0	0	0	0	0	0	0	0	3	0	0
AC0010	2	42	165	1.65	85	31.2213	2	0	0	0	0	0	0	0	0	0	0	0	0	0	0	0	0	0	0	0	0	8	0	0
AH46	2	42	158	1.58	88	35.2508	2	0	4	1	1	0	0	0	0	0	0	0	1	0	0	0	0	0	0	0	0	0	0	0
AH50	2	43	163	1.63	78	29.3575	2	0	2	1	2	0	0	1	1	0	0	0	0	0	0	0	0	0	0	0	0	8	0	0
GR19	2	43	152	1.52	50	21.6413	2	0	4	1	0	0	0	0	0	0	0	0	0	0	0	0	0	0	0	0	0	4	0	0
Ah2042	2	43	160	1.6	68	26.5625	2	0	2	0	0	0	0	0	0	0	0	0	0	0	0	0	0	0	0	0	0	4	0	0
GR34	2	43	158	1.58	90	36.0519	1	0	4	1	1	0	0	0	0	0	0	0	0	0	0	0	0	0	0	0	0	2	0	0
AD002	2	44	152	1.52	80	34.626	2	0	3	1	1	0	0	0	1	0	0	0	0	0	0	0	0	0	0	0	0	10	1	0
AD004	3	45	163	1.63	55	20.7008	2	0	0	1	0	0	0	0	0	0	0	0	0	0	0	0	0	0	0	0	0	9	0	0
Ah2030	3	45	165	1.65	64	23.5078	1	0	4	1	0	0	0	0	0	0	0	0	0	0	0	0	0	0	0	0	0	0	0	0
AC0012	3	45	154	1.54	66	27.8293	2	0	1	0	0	0	0	0	0	0	0	0	0	0	0	0	0	0	0	0	0	9	0	0
AB002	3	45	162	1.62	98	37.3419	2	0	3	0	0	0	0	0	0	0	0	0	0	0	0	0	0	0	0	0	0	8	0	0
AH38	3	45	160	1.6	95	37.1094	2	0	4	1	1	0	0	0	0	0	0	0	0	1	0	0	0	0	0	0	0	9	0	0
AH44	3	47	163	1.63	72	27.0993	2	0	4	1	0	0	0	0	0	0	0	0	0	0	0	0	0	0	0	0	0	0	0	0
Ah2025	3	48	148	1.48	60	27.3923	1	0	4	1	2	0	0	0	1	0	0	0	0	1	0	0	0	0	0	0	0	0	0	0
AH18	3	49	160	1.6	67	26.1719	2	0	0	0	0	0	0	0	0	0	0	0	0	0	0	0	0	0	0	0	0	6	0	0
AA007	3	49	162	1.62	73	27.8159	2	0	4	2	1	0	0	0	1	0	0	0	0	0	0	0	0	0	0	0	0	5	0	0
Ah2051	3	50	160	1.6	56	21.875	2	0	4	0	1	0	0	1	0	0	0	0	0	0	0	0	0	0	0	0	0	9	0	0
AC0011	3	52	167	1.67	87	31.1951	4	0	1	0	0	0	0	0	0	0	0	0	0	0	0	0	0	0	0	0	0	5	0	0
A007	3	53	160	1.6	68	26.5625	2	0	0	2	0	0	0	0	0	0	1	1	0	0	0	0	0	0	0	0	0	7	0	0
Ah2029	3	53	168	1.68	94	33.305	3	0	3	1	1	0	0	0	0	0	0	0	1	0	0	0	0	0	0	0	0	9	0	0
AH20	4	55	165	1.65	58	21.3039	2	0	1	0	1	0	0	1	0	0	0	0	0	0	0	0	0	0	0	0	0	5	0	0
AH2021	4	56	157	1.57	72	29.2101	2	0	4	1	2	0	0	1	0	0	0	0	1	0	0	0	0	0	0	0	0	10	1	0
GR20	4	56	179	1.79	90	28.089	2	0	3	1	0	0	0	0	0	0	0	0	0	0	0	0	0	0	0	0	0	4	0	0
AC009	4	58	167	1.67	83	29.7608	4	0	0	0	0	0	0	0	0	0	0	0	0	0	0	0	0	0	#NULL!	0	0	6	0	0
AMC004	4	60	160	1.6	60	23.4375	2	0	0	1	2	0	0	1	0	0	0	0	1	0	0	0	0	0	0	0	0	9	0	0
GR39	4	60	152	1.52	53	22.9398	4	0	0	2	0	0	0	0	0	0	0	0	0	0	0	0	0	0	0	0	0	5	0	0
Ah2028	5	66	159	1.59	65	25.711	2	0	1	0	0	0	0	0	0	0	0	0	0	0	0	0	0	0	0	0	0	6	0	0
